# Supplementary material for: Modulation of the photophysical properties of BODIPY dyes by substitution at their meso position.
Source: Royal Society of Chemistry journal article supplement (doi:10.1039/c1ra00020a), 2011-01-01
Supplement: c1ra00020a.pdf [file c1ra00020a.pdf]

## Supporting Information

### **Modulation of the Photophysical Properties of BODIPY Dyes by Substitution at their Meso Position.**

Jorge Bañuelos,<sup>\*a</sup> Ismael J. Arroyo-Córdoba,<sup>b</sup> Ismael Valois-Escamilla,<sup>c</sup> Alejandro Alvarez-Hernández,<sup>c</sup> Eduardo Peña-Cabrera,<sup>b</sup> Rongrong Hu,<sup>d</sup> Ben Zhong Tang,<sup>d</sup> Ixone Esnal,<sup>a</sup> Virginia Martínez,<sup>a</sup> Iñigo López Arbeloa.<sup>a</sup>

<sup>a</sup> Departamento Química Física, Universidad del País Vasco,-EHU, Apartado 644,  
48080-Bilbao, Spain

<sup>b</sup> Departamento de Química. Universidad de Guanajuato. Col. Noria Alta S/N.  
Guanajuato, Gto. 36050. Mexico

<sup>c</sup> Centro de Investigaciones Químicas, Universidad Autónoma del Estado de Hidalgo.  
Carretera Pachuca-Tulancingo Km. 4.5. Cd. Universitaria, Mineral de la Reforma,  
Hidalgo 42076, Mexico

<sup>d</sup> Department of Chemistry, Hong Kong University of Science and Technology, Clear  
Water Bay, Kowloon. Hong Kong, China

**Table S1.** Photophysical properties of dyes **1**, **2** and **3** in several solvents ranking from apolar (c-hexane), to polar (ethyl acetate and acetone), to polar/protic (ethanol, methanol and F<sub>3</sub>-ethanol). The corresponding data of the unsubstituted chromophore (BDP) are included for comparison.

| Solvent                 | $\lambda_{\text{abs}}$<br>(nm) | $\epsilon_{\text{max}}$<br>(10 <sup>4</sup> M <sup>-1</sup> cm <sup>-1</sup> ) | $\lambda_{\text{flu}}$<br>(nm) | $\Delta\nu_{\text{St}}$<br>(cm <sup>-1</sup> ) | $\phi$ | $\tau$<br>(ns) | $k_{\text{fl}}$<br>(10 <sup>8</sup> s <sup>-1</sup> ) | $k_{\text{nr}}$<br>(10 <sup>8</sup> s <sup>-1</sup> ) |
|-------------------------|--------------------------------|--------------------------------------------------------------------------------|--------------------------------|------------------------------------------------|--------|----------------|-------------------------------------------------------|-------------------------------------------------------|
| <b>BDP</b>              |                                |                                                                                |                                |                                                |        |                |                                                       |                                                       |
| F <sub>3</sub> -ethanol | 497.0                          | 6.1                                                                            | 505.0                          | 325                                            | 0.86   | 8.23           | 1.04                                                  | 0.17                                                  |
| methanol                | 497.0                          | 5.8                                                                            | 507.0                          | 395                                            | 0.87   | 7.33           | 1.18                                                  | 0.18                                                  |
| ethanol                 | 498.0                          | 5.6                                                                            | 508.0                          | 385                                            | 0.90   | 7.02           | 1.28                                                  | 0.14                                                  |
| acetone                 | 497.5                          | 5.5                                                                            | 507.5                          | 395                                            | 0.89   | 7.12           | 1.25                                                  | 0.15                                                  |
| ethyl acetate           | 498.0                          | 5.9                                                                            | 507.5                          | 370                                            | 0.93   | 6.90           | 1.34                                                  | 0.10                                                  |
| c-hexane                | 503.5                          | 7.6                                                                            | 510.5                          | 265                                            | 0.96   | 6.47           | 1.48                                                  | 0.06                                                  |
| <b>Dye 1</b>            |                                |                                                                                |                                |                                                |        |                |                                                       |                                                       |
| F <sub>3</sub> -ethanol | 489.0                          | 5.8                                                                            | 498.5                          | 385                                            | 0.86   | 7.95           | 1.08                                                  | 0.17                                                  |
| methanol                | 491.0                          | 5.9                                                                            | 501.5                          | 430                                            | 0.88   | 7.15           | 1.23                                                  | 0.16                                                  |
| ethanol                 | 492.0                          | 5.9                                                                            | 502.5                          | 425                                            | 0.90   | 6.84           | 1.31                                                  | 0.14                                                  |
| acetone                 | 491.0                          | 5.6                                                                            | 502.0                          | 450                                            | 0.92   | 6.93           | 1.32                                                  | 0.11                                                  |
| ethyl acetate           | 492.0                          | 5.3                                                                            | 502.0                          | 415                                            | 0.90   | 6.62           | 1.35                                                  | 0.15                                                  |
| c-hexane                | 497.0                          | 6.8                                                                            | 505.0                          | 315                                            | 0.95   | 6.23           | 1.52                                                  | 0.08                                                  |
| <b>Dye 2</b>            |                                |                                                                                |                                |                                                |        |                |                                                       |                                                       |
| F <sub>3</sub> -ethanol | 496.0                          | 2.9                                                                            | 505.5                          | 390                                            | 0.85   | 8.41           | 1.01                                                  | 0.18                                                  |
| methanol                | 497.5                          | 3.3                                                                            | 508.0                          | 415                                            | 0.87   | 7.58           | 1.14                                                  | 0.17                                                  |
| ethanol                 | 499.0                          | 3.3                                                                            | 509.5                          | 415                                            | 0.89   | 7.26           | 1.22                                                  | 0.15                                                  |
| acetone                 | 498.0                          | 3.2                                                                            | 508.5                          | 420                                            | 0.88   | 7.36           | 1.19                                                  | 0.16                                                  |
| ethyl acetate           | 498.5                          | 2.8                                                                            | 508.5                          | 400                                            | 0.94   | 7.04           | 1.33                                                  | 0.08                                                  |
| c-hexane                | 503.0                          | 3.4                                                                            | 512.0                          | 355                                            | 0.92   | 6.65           | 1.38                                                  | 0.12                                                  |
| <b>Dye 3</b>            |                                |                                                                                |                                |                                                |        |                |                                                       |                                                       |
| F <sub>3</sub> -ethanol | 490.0                          | 5.5                                                                            | 501.0                          | 450                                            | 0.87   | 8.10           | 1.07                                                  | 0.16                                                  |
| methanol                | 491.0                          | 5.9                                                                            | 502.5                          | 475                                            | 0.89   | 7.42           | 1.20                                                  | 0.15                                                  |
| ethanol                 | 492.0                          | 6.0                                                                            | 504.0                          | 475                                            | 0.89   | 7.09           | 1.25                                                  | 0.15                                                  |
| acetone                 | 490.5                          | 5.8                                                                            | 503.0                          | 505                                            | 0.91   | 7.16           | 1.27                                                  | 0.12                                                  |
| ethyl acetate           | 491.5                          | 5.4                                                                            | 503.0                          | 465                                            | 0.94   | 6.83           | 1.37                                                  | 0.08                                                  |
| c-hexane                | 496.5                          | 7.0                                                                            | 506.5                          | 385                                            | 0.97   | 6.50           | 1.49                                                  | 0.04                                                  |

absorption ( $\lambda_{\text{abs}}$ ) and fluorescence ( $\lambda_{\text{flu}}$ ) wavelength, Stokes shift ( $\Delta\nu_{\text{St}}$ ), molar absorption coefficient ( $\epsilon_{\text{max}}$ ), fluorescence quantum yield ( $\phi$ ) and lifetime ( $\tau$ ), radiative ( $k_{\text{fl}}$ ) and non-radiative ( $k_{\text{nr}}$ ) rate constant.

**Table S2.** Quantum mechanical simulation of the absorption transition properties for unsubstituted reference BDP chromophore and compound **5** and **6** in the gas phase. Absorption energy gap ( $\Delta E_{ab}$ ) and wavelength ( $\lambda_{ab}$ ), and oscillator strength ( $f$ ).

|                      | TD-B3LYP |          |          | ZINDO |          |          |
|----------------------|----------|----------|----------|-------|----------|----------|
|                      | BDP      | <b>5</b> | <b>6</b> | BDP   | <b>5</b> | <b>6</b> |
| $\Delta E_{ab}$ (eV) | 3.16     | 3.10     | 3.12     | 2.66  | 2.73     | 2.72     |
| $\lambda_{ab}$ (nm)  | 392      | 400      | 398      | 465   | 454      | 456      |
| $f$                  | 0.30     | 0.34     | 0.24     | 0.88  | 0.97     | 0.87     |

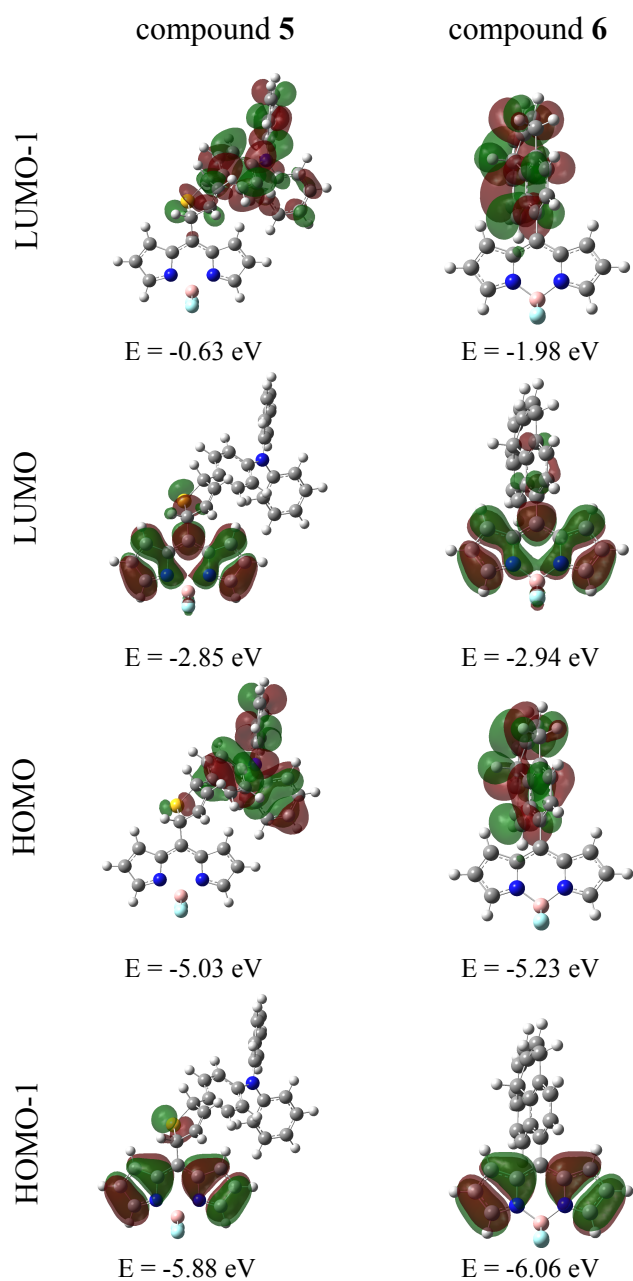

**Figure S1.** Molecular orbitals (electronic density and energy) of compound **5** and **6**.

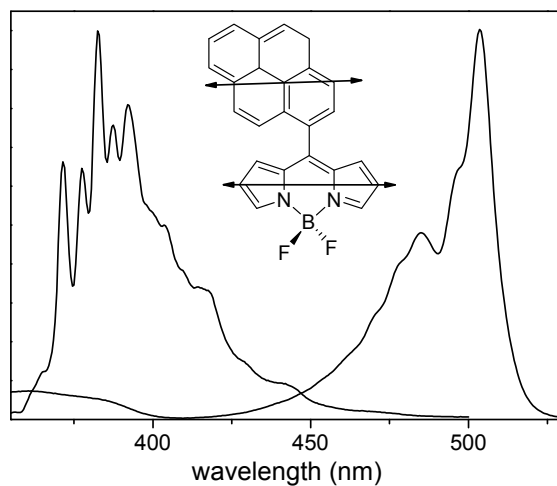

**Figure S2.** Spectral overlap of the fluorescence emission of the pyrene and the absorption spectrum of the BDP chromophore. The corresponding transition moment orientation of each chromophore in compound **6** is also enclosed.

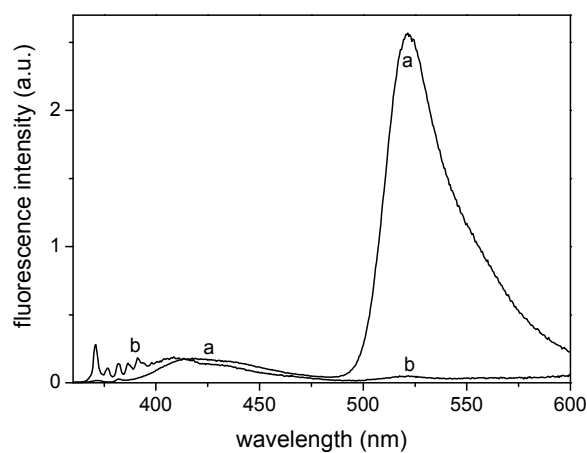

**Figure S3.** Fluorescence spectra of compound **6** at 298 K (a) and 77 K (b) in a diluted solution of cyclohexane
